# Supplementary material
Source: PubMed Central journal article supplement (PMC11110868)
Supplement: NIHMS1985634-supplement-Supplementary_Material.pdf [file NIHMS1985634-supplement-Supplementary_Material.pdf]

## Supporting Information

### **Engineering adhesive and antimicrobial hyaluronic acid/elastin like polypeptide hybrid hydrogels for tissue engineering applications**

*Ehsan Shirzaei Sani<sup>a</sup>, Roberto Portillo-Lara<sup>a,b</sup>, Andrew Spencer<sup>a</sup>, Wendy Yu<sup>a</sup>, Benjamin M. Geilich<sup>a</sup>, Iman Noshadi<sup>a</sup>, Thomas J. Webster<sup>a,c</sup>, and Nasim Annabi<sup>a,d,e\*</sup>*

<sup>a</sup>Department of Chemical Engineering, Northeastern University, Boston, MA, 02115, USA.

<sup>b</sup>Centro de Biotecnología FEMSA, Tecnológico de Monterrey, Monterrey, NL 64700, México.

<sup>c</sup>Wenzhou Institute of Biomaterials and Engineering, Wenzhou Medical University, Wenzhou, China.

<sup>d</sup>Biomaterials Innovation Center, Brigham and Women's Hospital, Harvard Medical School Boston, MA 02115, USA.

<sup>e</sup>Harvard-MIT Division of Health Sciences and Technology, Massachusetts Institute of Technology, Cambridge, MA 02139, USA.

\*Corresponding author: Nasim Annabi, Email: [n.annabi@neu.edu](mailto:n.annabi@neu.edu)

**Number of pages: 4**

**Number of Supporting Figures: 4**

The file includes:

**Figure S1.** Representative compressive cyclic stress–strain curves of MeHA/ELP hydrogels produced by using different ELP concentrations and 2% MeHA.

**Figure S2.** Ultimate tensile stress of MeHA/ELP hydrogels produced using different MeHA and ELP concentrations.

**Figure S3.** Swelling properties of photocrosslinked MeHA/ELP composite hydrogels.

**Figure S4.** *In vitro* cytocompatibility of MeHA/ELP and MeHA/ELP-ZnO hydrogels.

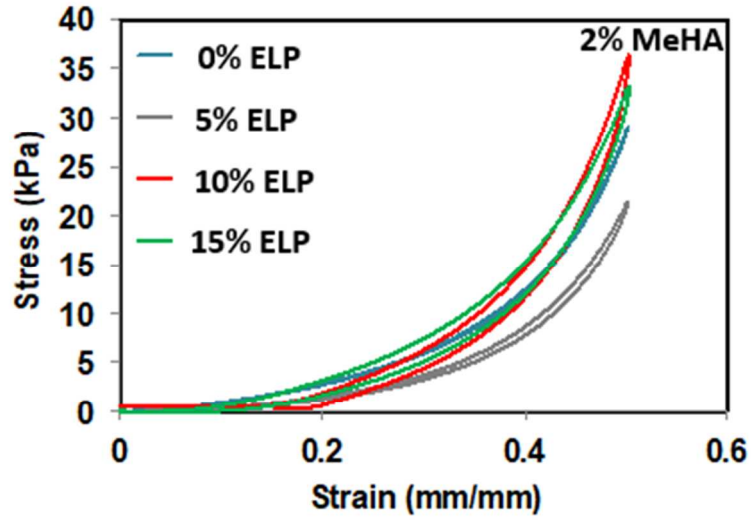

**Figure S1.** Representative compressive cyclic stress–strain curves of MeHA/ELP hydrogels produced by using different ELP concentrations and 2% MeHA.

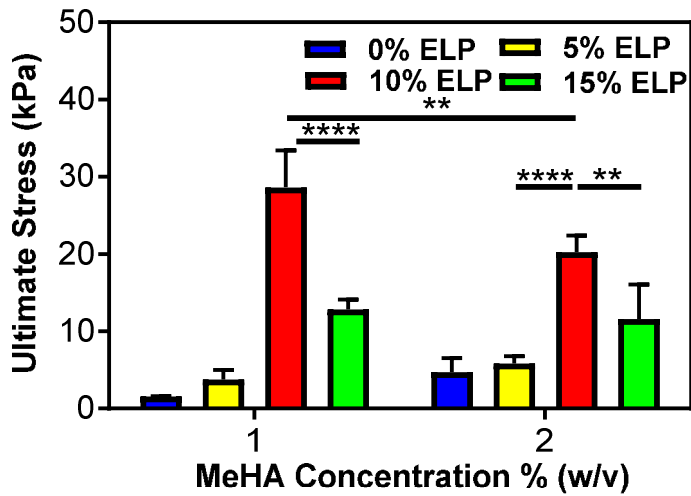

**Figure S2.** Ultimate tensile stress of MeHA/ELP hydrogels produced using different MeHA and ELP concentrations.

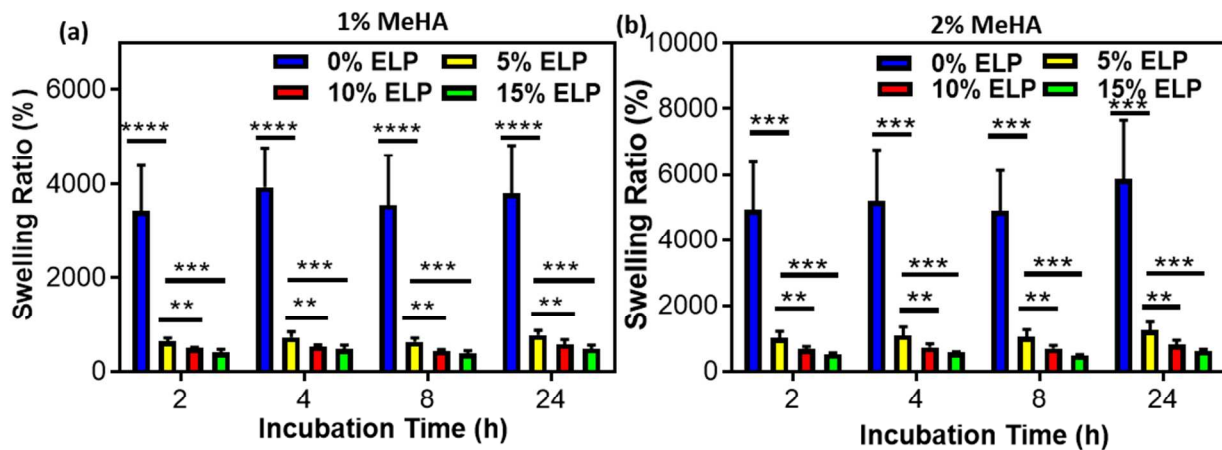

**Figure S3. Swelling properties of photocrosslinked MeHA/ELP composite hydrogels.** Swelling ratios of hydrogel produced by using various ELP concentrations and (a) 1% or (b) 2% (w/v) MeHA at 37 °C in DPBS (\*  $p < 0.05$ , \*\*  $p < 0.01$ , \*\*\*  $p < 0.001$ , \*\*\*\*  $p < 0.0001$ ).

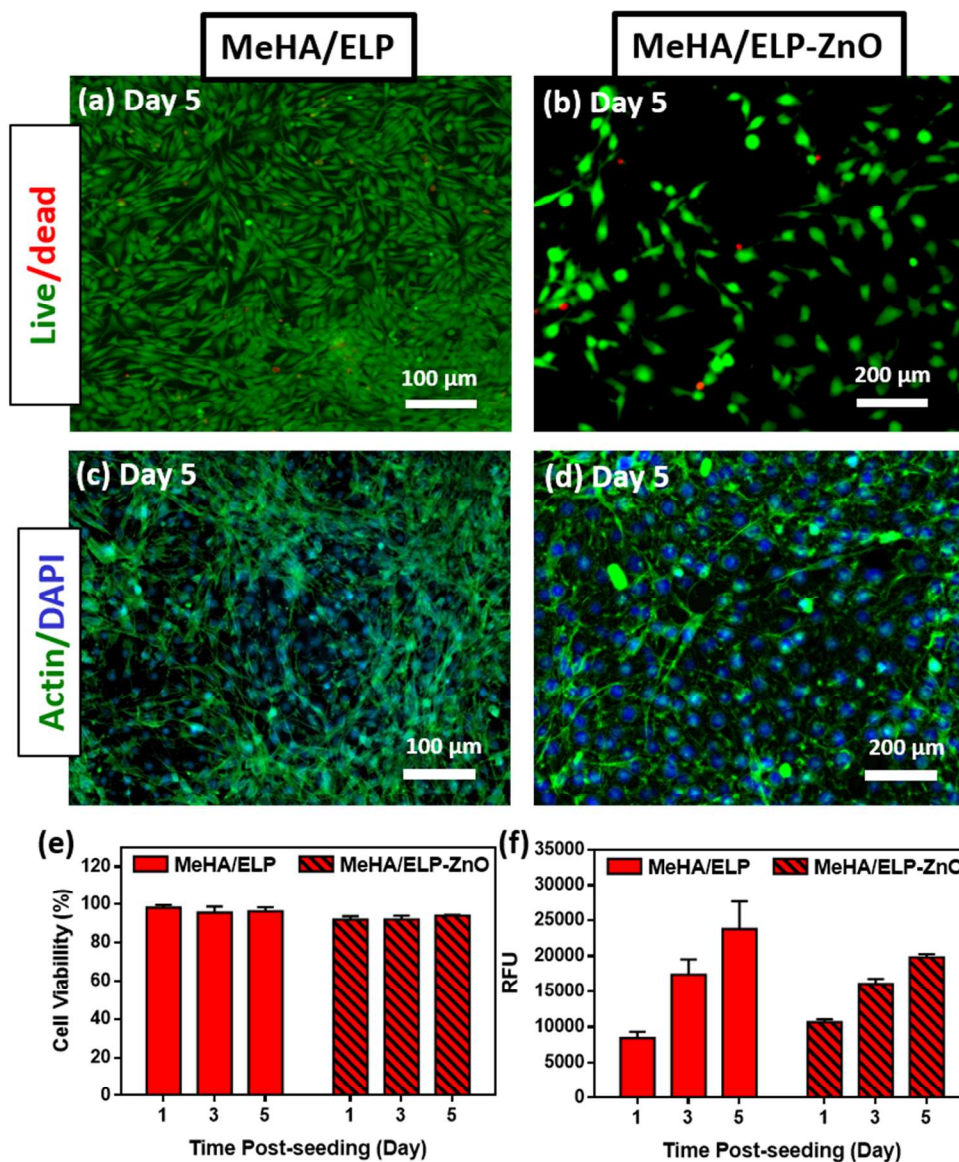

**Figure S4. *In vitro* cytocompatibility of MeHA/ELP and MeHA/ELP-ZnO hydrogels.** Representative live/dead images from NIH-3T3 cells seeded on (a) MeHA/ELP and (b) MeHA/ELP-ZnO hydrogels after 5 days of seeding. Representative phalloidin (green)/DAPI (blue) stained images from NIH-3T3 cells seeded on (c) MeHA/ELP and (d) MeHA/ELP-ZnO hydrogels after 5 days of culture. Quantification of (e) viability and (f) metabolic activity of NIH-3T3 seeded on hydrogels after 1, 3, and 5 days of culture. Hydrogels were formed by using 2% MeHA and 10% ELP with 0 and 0.2 % (w/v) ZnO nanoparticles at 120 sec UV exposure time (\*  $p < 0.05$ , \*\*  $p < 0.01$ ).
